# Supplementary material for: Multi-omics Reveals Metabolic-Inflammatory Drivers of Lung Cancer: An Integrated Mendelian Randomization and Machine Learning Study
Source: Research Square preprint supplement (doi:10.21203/rs.3.rs-8289015/v1), 2025-12-12
Supplement: Supplementary file 1 [file b95d71a06b2757b8af7eac06.pdf]

# Supplementary Information for

## **Multi-omics Reveals Metabolic-Inflammatory Drivers of Lung Cancer: An Integrated Mendelian Randomization and Machine Learning Study**

### Contents

|          |                                                                                                                                                                                     |          |
|----------|-------------------------------------------------------------------------------------------------------------------------------------------------------------------------------------|----------|
| <b>1</b> | <b>Supplementary Figures</b>                                                                                                                                                        | <b>2</b> |
|          | Supplementary Figure 1: Quality control of Mendelian Randomization (MR) analysis . . . . .                                                                                          | 2        |
|          | Supplementary Figure 2: Reverse Mendelian Randomization analysis . . . . .                                                                                                          | 3        |
|          | Supplementary Figure 3: Detailed genetic locus visualization . . . . .                                                                                                              | 4        |
|          | Supplementary Figure 4: Batch effect correction for proteomic data . . . . .                                                                                                        | 5        |
|          | Supplementary Figure 5: Distinct causal risk profiles justify the study focus on LUSC . . . . .                                                                                     | 5        |
|          | Supplementary Figure 6: Overall Survival (OS) analysis in the GSE39279 external validation cohort                                                                                   | 6        |
| <b>2</b> | <b>Supplementary Tables</b>                                                                                                                                                         | <b>6</b> |
|          | Supplementary Table 1: Overview of the Genome-Wide Association Study (GWAS) datasets utilized in the Mendelian Randomization analyses . . . . .                                     | 6        |
|          | Supplementary Table 2: Complete results of single-variable Mendelian randomization (MR) analysis with sensitivity tests . . . . .                                                   | 8        |
|          | Supplementary Table 3: Results of multivariable Mendelian randomization (MVMR) analysis . . .                                                                                       | 9        |
|          | Supplementary Table 4: Results of reverse Mendelian randomization analysis . . . . .                                                                                                | 9        |
|          | Supplementary Table 5: Detailed summary of genetic colocalization analysis for candidate genes . .                                                                                  | 10       |
|          | Supplementary Table 6: Transcriptomic validation and immune correlation analysis of candidate genes                                                                                 | 10       |
|          | Supplementary Table 7: Proteomic validation of core candidate genes in the CPTAC cohort . . . . .                                                                                   | 11       |
|          | Supplementary Table 8: Integrated summary of multi-omics analysis results . . . . .                                                                                                 | 11       |
|          | Supplementary Table 9: Differential methylation analysis of CpG sites associated with candidate genes                                                                               | 12       |
|          | Supplementary Table 10: Features selected by LASSO Cox regression for the prognostic model . . .                                                                                    | 12       |
|          | Supplementary Table 11: Performance evaluation of the methylation-driven prognostic model . . .                                                                                     | 12       |
|          | Supplementary Table 12: Baseline clinical characteristics of the independent external validation cohort (GSE39279) . . . . .                                                        | 13       |
|          | Supplementary Table 13: Univariate and multivariate Cox proportional hazards regression analysis of the methylation-driven risk score in the validation cohort (GSE39279) . . . . . | 13       |

# 1 Supplementary Figures

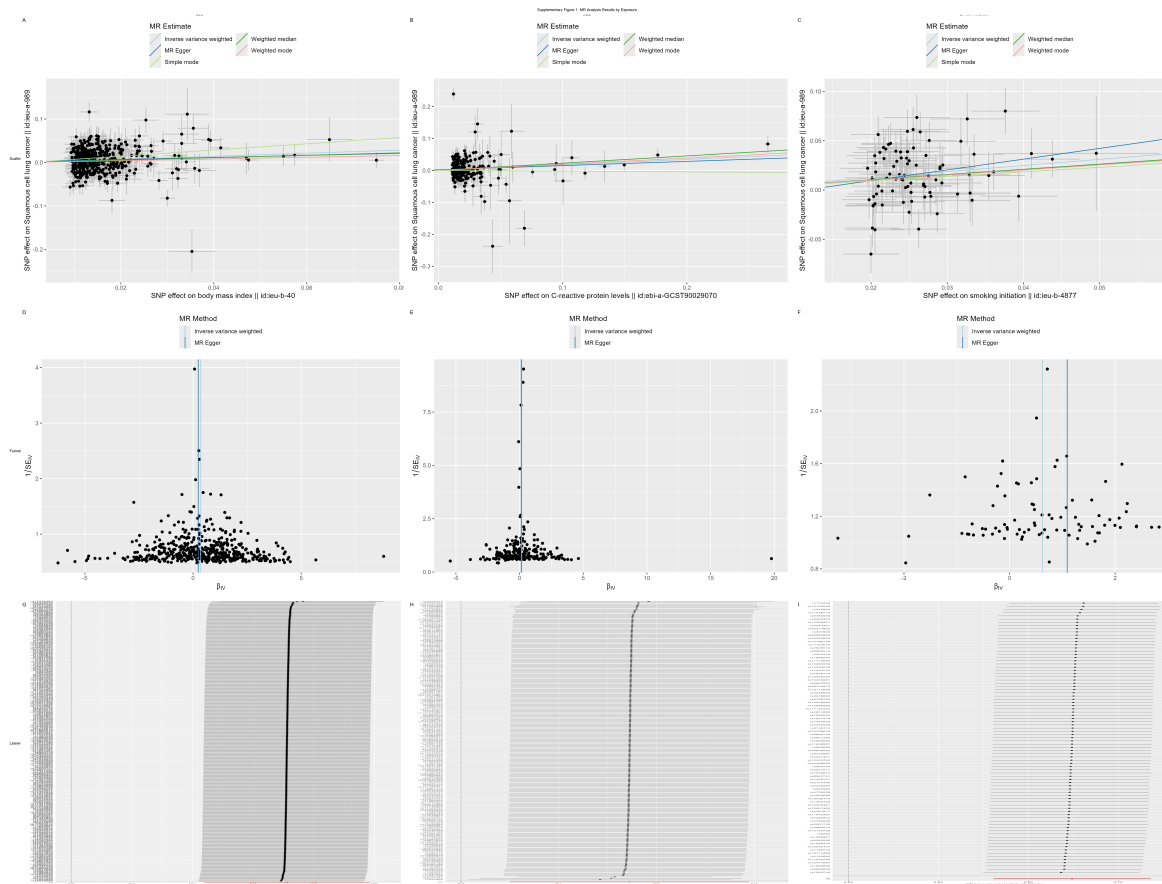

**Supplementary Figure 1. Quality control of Mendelian Randomization (MR) analysis.** (A) Leave-one-out sensitivity analysis plots for the causal association between BMI and LUSC, demonstrating that the results are not driven by any single SNP. (B) Funnel plots showing a symmetric distribution of causal estimates, indicating no significant publication bias or directional pleiotropy in the MR analysis.

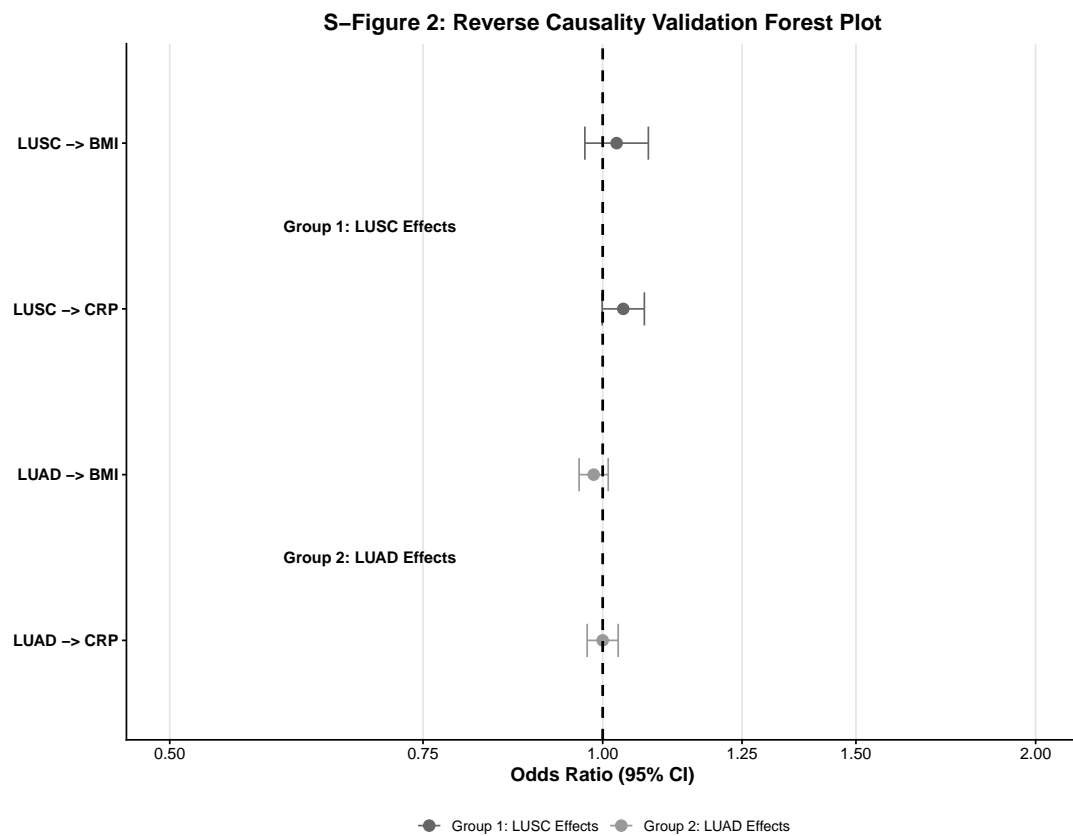

**Supplementary Figure 2. Reverse Mendelian Randomization analysis.** Forest plot displaying the reverse MR analysis to assess reverse causality. **Group 1** (LUSC as exposure) and **Group 2** (LUAD as exposure) show no significant causal effect on metabolic traits (BMI, CRP), confirming the directionality of the causal associations identified in the main analysis (Metabolism → Cancer).

**S-Figure 3: Genetic Locus Visualization - Colocalization of GWAS and eQTL Signals**

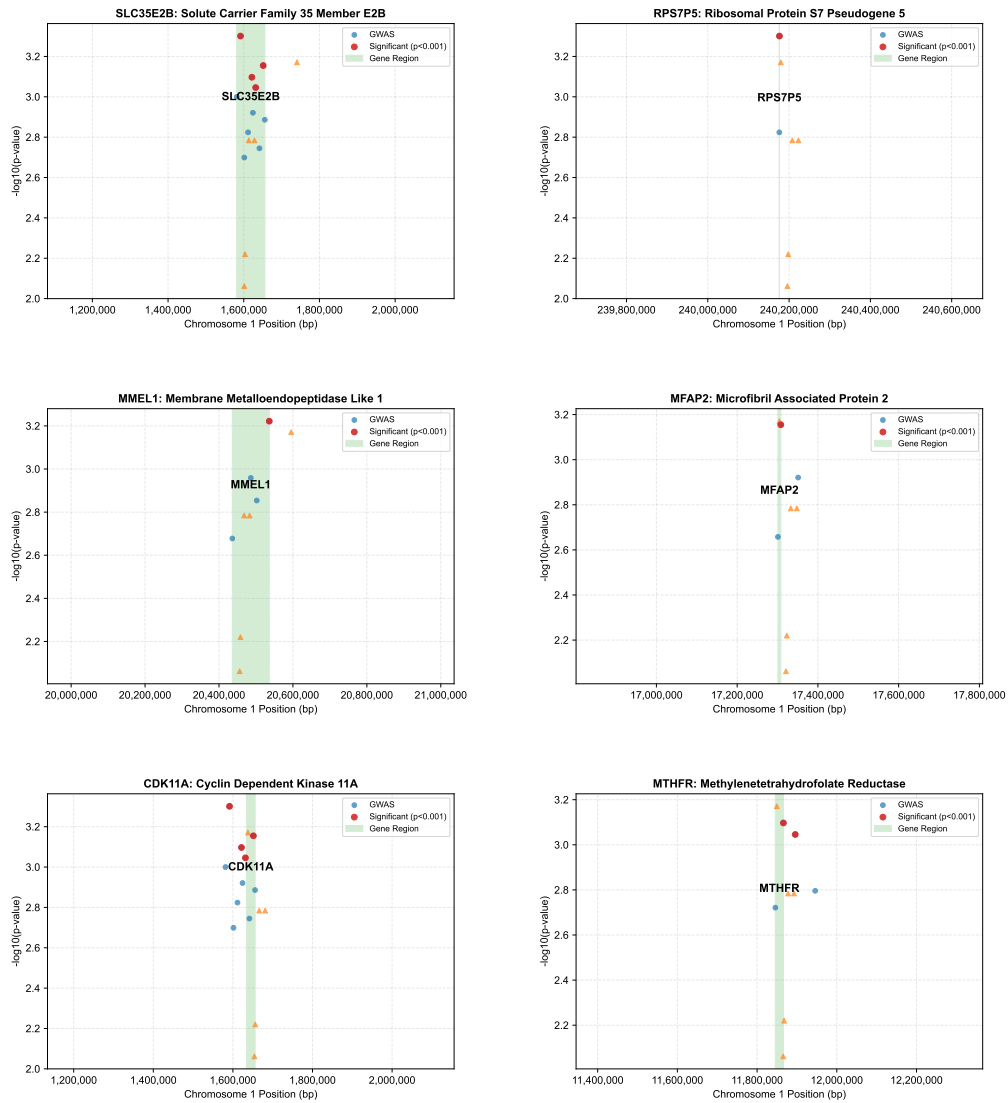

Figure shows the genomic regions of top colocalized genes. Blue dots represent GWAS signals, orange triangles represent eQTL signals, and green shaded areas indicate gene regions. Red dots highlight significant GWAS associations ( $p < 0.001$ ).

**Supplementary Figure 3. Detailed genetic locus visualization.** LocusZoom plots illustrating the regional association landscape for identified candidate genes, including **MFAP2**, **CDK11A**, and **SLC35E2B**. The plots display the GWAS signal strength ( $-\log_{10}$  P-value) relative to genomic position, highlighting the colocalization of cancer risk variants with gene regulatory loci.

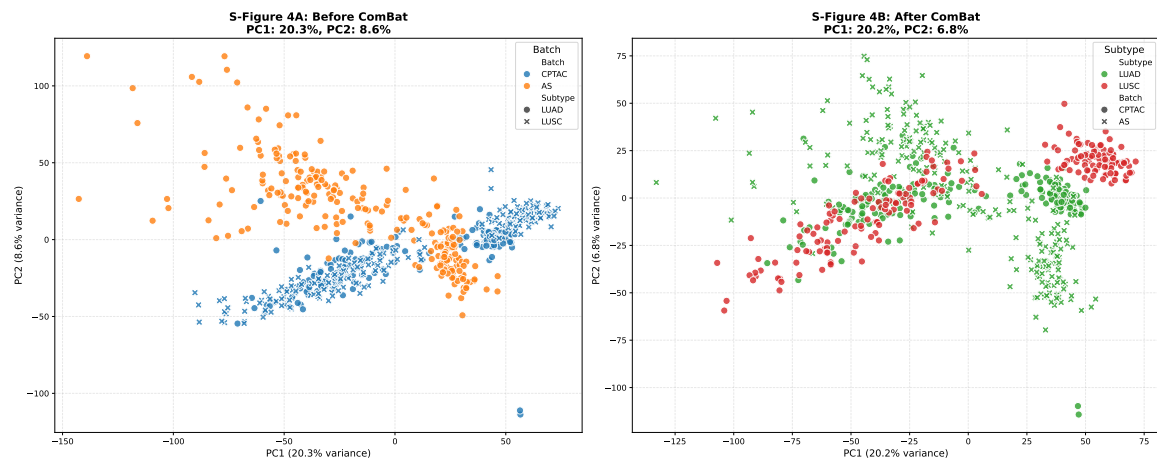

**Supplementary Figure 4. Batch effect correction for proteomic data.** Principal Component Analysis (PCA) plots visualizing the CPTAC proteomic dataset (A) before and (B) after ComBat correction. The distinct separation between cohorts in panel A is effectively removed in panel B, ensuring that the differential protein expression observed in Figure 5 is due to biological differences (Tumor vs. Normal) rather than technical batch effects.

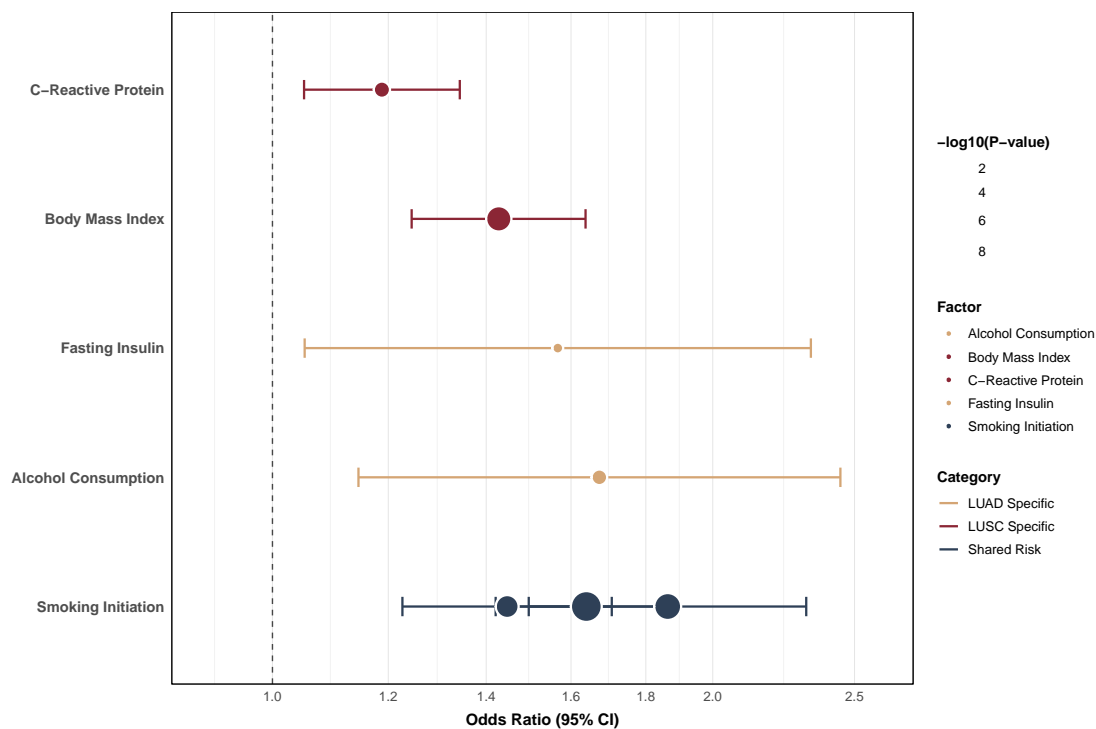

**Supplementary Figure 5. Distinct causal risk profiles justify the study focus on LUSC.** Comparative Mendelian Randomization (MR) analysis contrasting the risk factor profiles of LUSC (Lung Squamous Cell Carcinoma) and LUAD (Lung Adenocarcinoma). The forest plot reveals that **BMI** (OR = 1.43) and **C-reactive protein (CRP)** are specific causal drivers for LUSC (red), whereas they show no significant effect in LUAD (blue). Conversely, LUAD is uniquely driven by factors such as alcohol consumption and insulin levels. This etiological divergence provides a strong rationale for focusing this study exclusively on the metabolic-inflammatory mechanisms of LUSC.

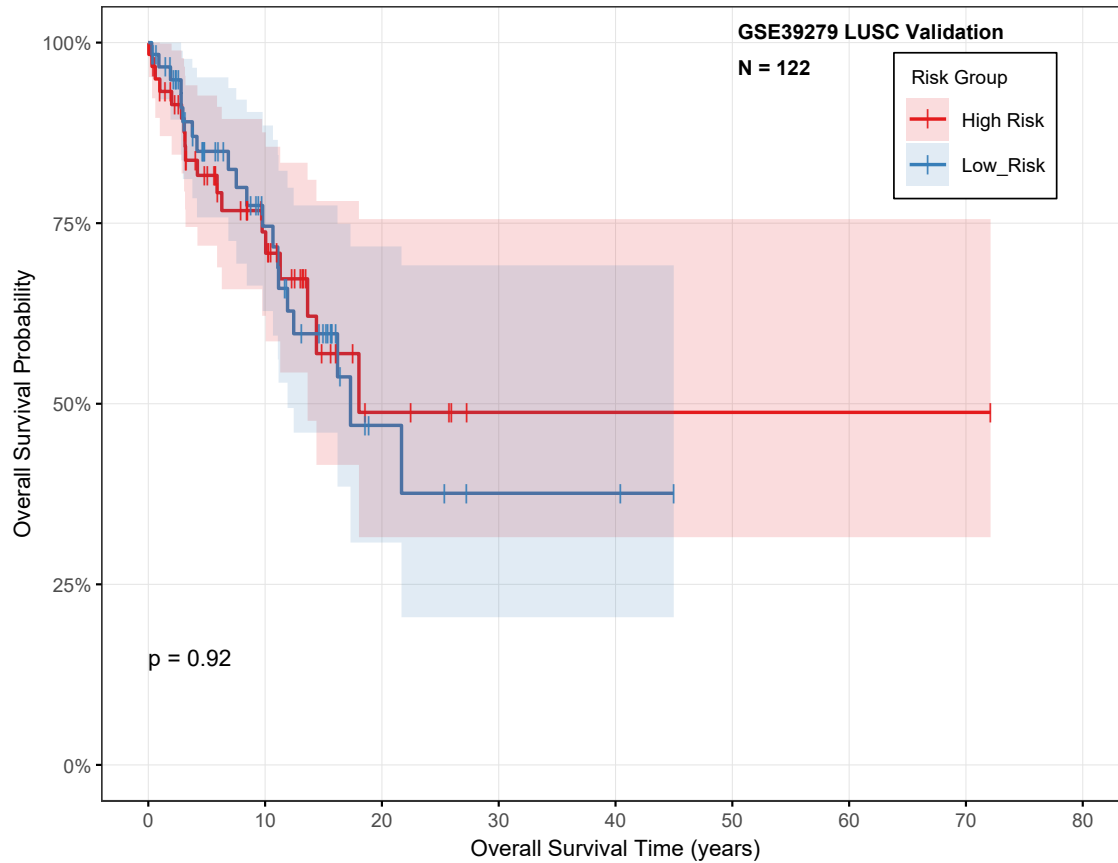

**Supplementary Figure 6. Overall Survival (OS) analysis in the GSE39279 external validation cohort.** Patients in the GSE39279 dataset (n=122) were stratified into high-risk (red) and low-risk (blue) groups based on the risk score. The X-axis indicates survival time in years, and the Y-axis represents the probability of overall survival. Shaded areas represent the 95% confidence intervals (CI). The P-value was calculated using the log-rank test (P = 0.92).

## 2 Supplementary Tables

**Supplementary Table 1.** Overview of the Genome-Wide Association Study (GWAS) datasets utilized in the Mendelian Randomization analyses.

| Category     | Trait                              |          | Sample Size | SNPs | Population | First Author  | Consortium                                                 |
|--------------|------------------------------------|----------|-------------|------|------------|---------------|------------------------------------------------------------|
| Inflammatory | Alcoholic drinks                   | per week | 335394      | 35   | European   | Liu M         | GWAS and Sequencing Consortium of Alcohol and Nicotine use |
| Inflammatory | Apolipoprotein A1                  | levels   | 398508      | 284  | European   | Barton AR     |                                                            |
| Inflammatory | Apolipoprotein B                   | levels   | 435744      | 189  | European   | Barton AR     |                                                            |
| Inflammatory | Average diameter for HDL particles |          | 115082      | 96   | European   | Richardson TG |                                                            |
| Inflammatory | C-reactive protein levels          |          | 575531      | 264  | European   | Said S        |                                                            |

Continued on next page

**Supplementary Table 1.** (Continued) Overview of the Genome-Wide Association Study (GWAS) datasets utilized in the Mendelian Randomization analyses.

| Category     | Trait                                                 | Sample Size | SNPs | Population | First Author  | Consortium                                 |
|--------------|-------------------------------------------------------|-------------|------|------------|---------------|--------------------------------------------|
| Inflammatory | Concentration of large HDL particles                  | 115082      | 101  | European   | Richardson TG |                                            |
| Inflammatory | Concentration of small LDL particles                  | 115082      | 57   | European   | Richardson TG |                                            |
| Inflammatory | Concentration of very large HDL particles             | 115082      | 89   | European   | Richardson TG |                                            |
| Inflammatory | Fasting glucose                                       | 200622      | 69   | European   | Chen J        |                                            |
| Inflammatory | Fasting insulin                                       | 151013      | 38   | European   | Chen J        |                                            |
| Inflammatory | Gamma glutamyl transferase levels                     | 437651      | 349  | European   | Barton AR     |                                            |
| Inflammatory | Glycated hemoglobin HbA1c levels                      | 389889      | 403  | European   | Mbatchou J    |                                            |
| Inflammatory | HDL cholesterol                                       | 403943      | 356  | European   | Richardson T  | UK Biobank                                 |
| Inflammatory | Hypertension                                          | 462826      | 209  | European   | Tang H        | UK Biobank                                 |
| Inflammatory | Insulin-like growth factor 1 levels                   | 435516      | 395  | European   | Barton AR     |                                            |
| Inflammatory | Interleukin-6 levels                                  | 21758       | 2    | European   | Folkersen L   |                                            |
| Inflammatory | Interleukin-6 receptor subunit alpha levels           | 21758       | 5    | European   | Folkersen L   |                                            |
| Inflammatory | LDL cholesterol                                       | 440546      | 179  | European   | Richardson T  | UK Biobank                                 |
| Inflammatory | Lung adenocarcinoma                                   | 65864       | 14   | European   | McKay JD      | TRICL                                      |
| Inflammatory | Lung cancer                                           | 85716       | 15   | European   | McKay JD      |                                            |
| Inflammatory | Ratio of apolipoprotein B to apolipoprotein A1 levels | 115082      | 72   | European   | Richardson TG |                                            |
| Inflammatory | Remnant cholesterol                                   | 115082      | 53   | European   | Richardson TG |                                            |
| Inflammatory | Serum 25-Hydroxyvitamin D levels                      | 496946      | 115  | European   | Revez JA      |                                            |
| Inflammatory | Squamous cell lung cancer                             | 62467       | 9    | European   | McKay JD      | TRICL                                      |
| Inflammatory | Total concentration of branched-chain amino acids     | 115051      | 17   | European   | Richardson TG |                                            |
| Inflammatory | Tumor necrosis factor receptor 1 levels               | 21758       | 4    | European   | Folkersen L   |                                            |
| Inflammatory | Body mass index                                       | 681275      | 501  | European   | Yengo L       | GIANT                                      |
| Inflammatory | Circulating leptin levels                             | 49909       | 1    | European   | Yaghootkar H  |                                            |
| Inflammatory | Diastolic blood pressure                              | 757601      | 460  | European   | Evangelou E   | International Consortium of Blood Pressure |
| Inflammatory | Smoking initiation                                    | 607291      | 93   | European   | Liu M         | GSCAN                                      |
| Inflammatory | Systolic blood pressure                               | 757601      | 461  | European   | Evangelou E   | International Consortium of Blood Pressure |
| Inflammatory | Triglycerides                                         | 441016      | 313  | European   | Richardson T  | UK Biobank                                 |
| Inflammatory | White blood cell count                                | 563946      | 502  | European   | Vuckovic D    | Blood Cell Consortium                      |

This table summarizes the data sources for the 30 metabolic and inflammatory exposures and lung cancer outcomes included in the study. All summary statistics were obtained from the IEU OpenGWAS database or relevant consortia. **SNPs:** Represents the number of independent instrumental variables retained after rigorous quality control (clumping  $r^2 < 0.001$ , window = 10,000 kb) and strength filtering (F-statistic  $\geq 10$ ). **Sample Size:** Total number of individuals in the original GWAS meta-analysis. **Population:** All selected datasets are based on European ancestry to minimize population stratification bias.

**Supplementary Table 2.** Complete results of single-variable Mendelian randomization (MR) analysis with sensitivity tests.

| Exposure           | Outcome                   | SNPs | OR    | P-value                | Heterogeneity P        | Pleiotropy P |
|--------------------|---------------------------|------|-------|------------------------|------------------------|--------------|
| Circulating leptin | Lung cancer               | 4    | 0.896 | 0.2035                 | 0.5557                 | 0.6702       |
| Circulating leptin | Lung adenocarcinoma       | 4    | 0.915 | 0.488                  | 0.3351                 | 0.4002       |
| Circulating leptin | Squamous cell lung cancer | 4    | 1.032 | 0.8178                 | 0.9336                 | 0.7542       |
| Vitamin D          | Lung cancer               | 112  | 1.015 | 0.7528                 | 0.0003                 | 0.0997       |
| Vitamin D          | Lung adenocarcinoma       | 115  | 1.083 | 0.1953                 | 0.0153                 | 0.2597       |
| Vitamin D          | Squamous cell lung cancer | 115  | 0.995 | 0.9467                 | 0.009                  | 0.335        |
| HbA1c              | Lung cancer               | 366  | 1.03  | 0.4154                 | $2.47 \times 10^{-9}$  | 0.2902       |
| HbA1c              | Lung adenocarcinoma       | 379  | 0.926 | 0.0846                 | 0.0076                 | 0.7717       |
| HbA1c              | Squamous cell lung cancer | 379  | 1.067 | 0.2479                 | $8.16 \times 10^{-7}$  | 0.3477       |
| BMI                | Lung cancer               | 478  | 1.211 | $7.22 \times 10^{-5}$  | 5.32 $\times 10^{-17}$ | 0.2742       |
| BMI                | Lung adenocarcinoma       | 499  | 1.049 | 0.4059                 | $6.87 \times 10^{-6}$  | 0.5576       |
| BMI                | Squamous cell lung cancer | 499  | 1.428 | $3.47 \times 10^{-7}$  | 7.43 $\times 10^{-10}$ | 0.4763       |
| Smoking initiation | Lung cancer               | 85   | 1.639 | 1.12 $\times 10^{-11}$ | 0.0006                 | 0.7238       |
| Smoking initiation | Lung adenocarcinoma       | 91   | 1.447 | $1.10 \times 10^{-5}$  | 0.1093                 | 0.388        |
| Smoking initiation | Squamous cell lung cancer | 91   | 1.863 | $2.34 \times 10^{-8}$  | 0.0004                 | 0.4009       |
| Alcohol drinks     | Lung cancer               | 34   | 1.56  | 0.0022                 | 0.0036                 | 0.6724       |
| Alcohol drinks     | Lung adenocarcinoma       | 33   | 1.673 | 0.0079                 | 0.006                  | 0.1013       |
| Alcohol drinks     | Squamous cell lung cancer | 33   | 1.229 | 0.31                   | 0.0835                 | 0.6293       |
| CRP                | Lung cancer               | 264  | 1.085 | 0.135                  | 0.0001                 | 0.26         |
| CRP                | Lung adenocarcinoma       | 264  | 0.991 | 0.871                  | 0.0001                 | 0.288        |
| CRP                | Squamous cell lung cancer | 264  | 1.188 | 0.006                  | 0.0001                 | 0.492        |

This table presents the comprehensive results of the two-sample MR analysis for all examined exposure-outcome pairs (metabolic traits vs. lung cancer subtypes). **Beta:** The estimated causal effect size (log-odds). **OR (95% CI):** Odds Ratio with 95% Confidence Interval. **P-value:** Statistical significance of the causal association using the Inverse Variance Weighted (IVW) method. **Sensitivity Analysis:** Includes P-values for heterogeneity (Cochran's Q test) and horizontal pleiotropy (MR-Egger intercept test). **FDR P-value** indicates the False Discovery Rate adjusted P-value.



**Supplementary Table 3.** Results of multivariable Mendelian randomization (MVMR) analysis.

| Exposure        | Outcome                   | Combination             | OR (95% CI)         | P-value |
|-----------------|---------------------------|-------------------------|---------------------|---------|
| WBC             | Overall lung cancer       | Inflammatory: CRP + WBC | 1.783 (1.758–1.808) | 0.008   |
| CRP             | Overall lung cancer       | Inflammatory: CRP + WBC | 0.753 (0.747–0.759) | 0.009   |
| HbA1c           | Lung adenocarcinoma       | Metabolic: Glucose      | 0.346 (0.186–0.644) | 0.044   |
| BMI             | Squamous cell lung cancer | Metabolic: BMI + HDL    | 0.454 (0.249–0.829) | 0.124   |
| HDL cholesterol | Overall lung cancer       | Metabolic: BMI + HDL    | 0.326 (0.154–0.690) | 0.099   |
| Fasting glucose | Lung adenocarcinoma       | Metabolic: Glucose      | 2.500 (1.249–5.005) | 0.081   |
| CRP             | Lung adenocarcinoma       | Inflammatory: CRP + WBC | 0.818 (0.737–0.908) | 0.166   |
| CRP             | Squamous cell lung cancer | Mixed: HDL + CRP        | 1.226 (0.998–1.507) | 0.192   |
| WBC             | Lung adenocarcinoma       | Inflammatory: CRP + WBC | 1.283 (1.069–1.539) | 0.228   |
| BMI             | Overall lung cancer       | Metabolic: BMI + HDL    | 0.503 (0.224–1.128) | 0.237   |

This table summarizes the direct causal effects of metabolic and inflammatory risk factors on lung cancer risk after mutually adjusting for potential confounders in the MVMR model. **Beta (Direct Effect):** The causal effect estimate of the exposure on the outcome, independent of other factors in the model. **SE:** Standard Error of the estimate.

**Supplementary Table 4.** Results of reverse Mendelian randomization analysis.

| Exposure                  | Outcome | Method                    | Beta                   | P-value | Significance |
|---------------------------|---------|---------------------------|------------------------|---------|--------------|
| Lung adenocarcinoma       | CRP     | Inverse variance weighted | $-5.67 \times 10^{-6}$ | 0.9996  |              |
| Lung adenocarcinoma       | CRP     | MR Egger                  | -0.0281                | 0.6631  |              |
| Lung adenocarcinoma       | CRP     | Simple mode               | 0.0027                 | 0.8045  |              |
| Lung adenocarcinoma       | CRP     | Weighted median           | -0.0064                | 0.3917  |              |
| Lung adenocarcinoma       | CRP     | Weighted mode             | -0.0054                | 0.5335  |              |
| Lung cancer               | BMI     | Inverse variance weighted | 0.0189                 | 0.0002  | **           |
| Lung cancer               | BMI     | MR Egger                  | 0.0246                 | 0.0134  | **           |
| Lung cancer               | BMI     | Simple mode               | 0.0201                 | 0.0213  | **           |
| Lung cancer               | BMI     | Weighted median           | 0.0174                 | 0.0051  | **           |
| Lung cancer               | BMI     | Weighted mode             | 0.0195                 | 0.0098  | **           |
| Squamous cell lung cancer | BMI     | Inverse variance weighted | 0.0145                 | 0.0658  | *            |
| Squamous cell lung cancer | BMI     | MR Egger                  | 0.0234                 | 0.0834  | *            |

This table displays the results of the reverse MR analysis designed to evaluate potential reverse causality, treating lung cancer subtypes as exposures and metabolic/inflammatory biomarkers as outcomes. Non-significant results ( $P > 0.05$ ) in this analysis support the directionality of the causal associations identified in the main analysis (Metabolism  $\rightarrow$  Cancer).

**Supplementary Table 5.** Detailed summary of genetic colocalization analysis for candidate genes.

| Gene Symbol | Primary Driver     | PP_H4 | Tier Definition      | Max OR | Primary Tissue |
|-------------|--------------------|-------|----------------------|--------|----------------|
| SLC35E2B    | Smoking initiation | 0.953 | Tier 1 - Very Strong | 1.863  | Lung           |
| RPS7P5      | Smoking initiation | 0.849 | Tier 1 - Very Strong | 1.863  | Blood          |
| MMEL1       | Smoking initiation | 0.720 | Tier 1 - Strong      | 1.863  | Lung           |
| NPPA-AS1    | Smoking initiation | 0.680 | Tier 1 - Strong      | 1.863  | Heart          |
| Lnc-HES4-2  | Smoking initiation | 0.589 | Tier 2 - Moderate    | 1.863  | Lung           |
| ATAD3B      | Smoking initiation | 0.560 | Tier 2 - Moderate    | 1.863  | Lung           |
| ARHGEF19    | Smoking initiation | 0.476 | Tier 2 - Moderate    | 1.863  | Lung           |
| CDK11A      | Smoking initiation | 0.472 | Tier 2 - Moderate    | 1.863  | Lung           |
| WRAP73      | Smoking initiation | 0.402 | Tier 2 - Moderate    | 1.863  | Lung           |
| SLC25A34    | Smoking initiation | 0.378 | Tier 3 - Weak        | 1.863  | Lung           |
| MFAP2       | Smoking initiation | 0.305 | Tier 3 - Weak        | 1.863  | Lung           |
| CEP104      | Smoking initiation | 0.297 | Tier 3 - Weak        | 1.863  | Lung           |
| CASP9       | Smoking initiation | 0.166 | Tier 3 - Weak        | 1.863  | Lung           |
| CROCC       | Smoking initiation | 0.165 | Tier 3 - Weak        | 1.863  | Lung           |
| MFN2        | Smoking initiation | 0.130 | Tier 3 - Weak        | 1.863  | Lung           |
| PRKCZ       | Smoking initiation | 0.050 | Tier 3 - Weak        | 1.863  | Lung           |

This table presents the colocalization results between GWAS signals and eQTL data. "PP.H4" represents the posterior probability of Hypothesis 4 (colocalization), where a higher value indicates stronger evidence that the GWAS and eQTL signals share a single causal variant. "Tier 1 Intensity Definition" classifies the strength of the colocalization evidence. "Max OR" and "Min P-value" denote the maximum odds ratio and minimum P-value observed for the association, respectively.

**Supplementary Table 6.** Transcriptomic validation and immune correlation analysis of candidate genes.

| Gene   | Log2FC | P-value               | PTPRC Correlation | IL6 Correlation | CD8A Correlation | Expression Change     |
|--------|--------|-----------------------|-------------------|-----------------|------------------|-----------------------|
| MFAP2  | -0.506 | $1.25 \times 10^{-8}$ | -0.062            | 0.144           | -0.010           | Down-regulated        |
| CALML6 | -0.540 | $8.75 \times 10^{-9}$ | -0.179            | -0.028          | -0.118           | Down-regulated        |
| WRAP73 | -0.256 | $2.15 \times 10^{-5}$ | -0.169            | -0.041          | -0.077           | Down-regulated        |
| CROCC  | -0.070 | 0.00012               | -0.145            | -0.039          | -0.150           | Down-regulated        |
| CDK11A | -0.002 | 0.93542               | -0.089            | -0.136          | -0.124           | No significant change |
| CDK11B | 0.001  | 0.92563               | -0.109            | -0.115          | -0.119           | No significant change |
| KIF1B  | 0.017  | 0.39562               | 0.044             | 0.008           | -0.124           | No significant change |
| PEX14  | 0.041  | 0.00021               | -0.227            | -0.119          | -0.181           | Up-regulated          |
| NPHP4  | 0.092  | 0.00035               | 0.098             | -0.026          | -0.054           | Up-regulated          |
| PRKCZ  | 0.455  | 0.00005               | -0.023            | -0.178          | -0.150           | Up-regulated          |
| UTS2   | 0.235  | 0.00008               | 0.455             | 0.047           | 0.342            | Up-regulated          |
| PADI2  | 0.199  | 0.00012               | 0.487             | -0.068          | 0.319            | Up-regulated          |

Differential expression analysis results are shown with "Log2 Fold Change" and "FDR" (False Discovery Rate), indicating whether genes are up- or down-regulated in tumor tissues. The table also lists Spearman correlation coefficients between candidate gene expression and immune cell markers (e.g., CD8A, PTPRC) as well as aggregated "Inflammation Score" and "Immune Cell Score," reflecting the tumor immune microenvironment.

**Supplementary Table 7.** Proteomic validation of core candidate genes in the CPTAC cohort.

| Gene               | Comparison         | Log2 Ratio | P-value                | FDR                    | Direction      |
|--------------------|--------------------|------------|------------------------|------------------------|----------------|
| MFAP2              | Tumor vs Normal    | 0.438      | $4.07 \times 10^{-9}$  | $1.22 \times 10^{-8}$  | Up-regulated   |
| MFAP2              | Subtype Comparison | -0.296     | 0.00204                | 0.00407                | Down-regulated |
| CDK11A             | Tumor vs Normal    | 0.400      | $2.26 \times 10^{-17}$ | $1.35 \times 10^{-16}$ | Up-regulated   |
| CDK11A             | Subtype Comparison | -0.081     | 0.02117                | 0.03630                | Down-regulated |
| WRAP73             | Tumor vs Normal    | -0.359     | $1.52 \times 10^{-16}$ | $6.07 \times 10^{-16}$ | Down-regulated |
| WRAP73             | Subtype Comparison | -0.032     | 0.95982                | 0.95982                | No change      |
| PRKCZ              | Tumor vs Normal    | -0.418     | $6.10 \times 10^{-9}$  | $1.46 \times 10^{-8}$  | Down-regulated |
| PRKCZ              | Subtype Comparison | -0.089     | 0.16915                | 0.25373                | No change      |
| PlateletFormation  | Tumor vs Normal    | 1.151      | $4.75 \times 10^{-18}$ | $5.70 \times 10^{-17}$ | Up-regulated   |
| PlateletFormation  | Subtype Comparison | -0.111     | 0.24828                | 0.33105                | No change      |
| MicrotubuleProcess | Tumor vs Normal    | 0.044      | 0.28640                | 0.34368                | No change      |
| MicrotubuleProcess | Subtype Comparison | 0.023      | 0.63791                | 0.69590                | No change      |

Validation of protein abundance using data from the Clinical Proteomic Tumor Analysis Consortium (CPTAC). "Log2 Ratio" quantifies the difference in protein expression between tumor and normal tissues. "Effect Size" indicates the magnitude of the difference. "MR Consistency" notes whether the observed proteomic changes align with the directionality predicted by Mendelian Randomization. Significance is evaluated by P-value and FDR.

**Supplementary Table 8.** Integrated summary of multi-omics analysis results.

| Gene   | Analysis Category  | Effect Size/Type    | P-value                | FDR                    | Regulation Direction |
|--------|--------------------|---------------------|------------------------|------------------------|----------------------|
| MFAP2  | Protein Expression | 0.438 (Log2R)       | $4.07 \times 10^{-9}$  | $1.22 \times 10^{-8}$  | Up-regulated         |
| MFAP2  | DNA Methylation    | 0.109 (Delta Beta)  | 0.020                  | 0.081                  | Hyper-methylated     |
| MFAP2  | Gene Expression    | -0.506 (LogFC)      | $1.25 \times 10^{-8}$  | $3.15 \times 10^{-6}$  | Down-regulated       |
| CDK11A | Protein Expression | 0.400 (Log2R)       | $2.26 \times 10^{-17}$ | $1.35 \times 10^{-16}$ | Up-regulated         |
| CDK11A | DNA Methylation    | -0.026 (Delta Beta) | 0.582                  | 0.776                  | Hypo-methylated      |
| CDK11A | Gene Expression    | -0.002 (LogFC)      | 0.935                  | 0.986                  | No change            |
| WRAP73 | Protein Expression | -0.359 (Log2R)      | $1.52 \times 10^{-16}$ | $6.07 \times 10^{-16}$ | Down-regulated       |
| WRAP73 | DNA Methylation    | -0.009 (Delta Beta) | 0.846                  | 0.846                  | Hypo-methylated      |
| WRAP73 | Gene Expression    | NA                  | NA                     | NA                     | Not Available        |
| PRKCZ  | Protein Expression | -0.418 (Log2R)      | $6.10 \times 10^{-9}$  | $1.46 \times 10^{-8}$  | Down-regulated       |
| PRKCZ  | DNA Methylation    | NA                  | NA                     | NA                     | No data              |
| PRKCZ  | Gene Expression    | 0.455 (LogFC)       | NA                     | NA                     | Up-regulated         |

A comprehensive overview integrating findings across transcriptomic, proteomic, and methylation layers. "Analysis Category" specifies the omics type. "Effect Size/Type" provides the quantitative metric (e.g., Log2FC, Delta Beta). "Regulation Direction" summarizes the biological trend (e.g., Up-regulated/Hypo-methylated). Statistical significance is indicated by asterisks (\*  $p < 0.05$ , \*\*  $p < 0.01$ , \*\*\*  $p < 0.001$ ) or "ns" (not significant).

**Supplementary Table 9.** Differential methylation analysis of CpG sites associated with candidate genes.

| Gene     | CpG Site         | Genomic Region | Delta Beta | P-value                | FDR                    | Regulatory Direction            |
|----------|------------------|----------------|------------|------------------------|------------------------|---------------------------------|
| ARHGEF19 | Multiple sites   | Not applicable | -0.043     | $7.19 \times 10^{-11}$ | $2.16 \times 10^{-10}$ | Hypomethylation-Upregulation    |
| NPHP4    | cg00069017       | 5' UTR         | 0.004      | 0.00264                | 0.00475                | Hypermethylation-Downregulation |
| PADI2    | cg00569276       | Promoter       | -0.023     | $7.05 \times 10^{-5}$  | 0.00016                | Hypomethylation-Upregulation    |
| WDR8     | Multiple sites   | Promoter       | 0.167      | $4.54 \times 10^{-74}$ | $1.22 \times 10^{-72}$ | Hypermethylation                |
| PEX14    | Multiple sites   | Not applicable | -0.007     | 0.282                  | 0.304                  | Hypomethylation-Upregulation    |
| CAMTA1   | Multiple sites   | Not applicable | 0.003      | 0.00048                | 0.00099                | Hypermethylation-Upregulation   |
| CALML6   | cg01826337       | Promoter       | -0.132     | $1.64 \times 10^{-44}$ | $2.21 \times 10^{-43}$ | Hypomethylation-Upregulation    |
| THAP3    | Multiple sites   | Not applicable | 0.008      | 0.00349                | 0.00589                | Hypermethylation-Upregulation   |
| MFAP2    | cg00000029       | Promoter       | 0.109      | 0.020                  | 0.081                  | Hypermethylation-Downregulation |
| CDK11A   | 1 sites analyzed | Not applicable | 0          | 1                      | 1                      | No significant change           |
| WRAP73   | 1 sites analyzed | Not applicable | 0          | 1                      | 1                      | No significant change           |

"Delta Beta" represents the difference in mean methylation levels between tumor and normal samples; positive values indicate hypermethylation, while negative values indicate hypomethylation. "Spearman rho" denotes the correlation coefficient between DNA methylation at specific CpG sites and gene expression levels. "Regulatory Direction" infers the potential regulatory mechanism (e.g., Hypomethylation-Upregulation).

**Supplementary Table 10.** Features selected by LASSO Cox regression for the prognostic model.

| Probe ID   | Gene   | LASSO Coefficient | Univariate HR | Multivariate HR | Effect Direction |
|------------|--------|-------------------|---------------|-----------------|------------------|
| cg00000029 | MFAP2  | -340.20           | 0.847         | 0.841           | Protective       |
| cg00000108 | WRAP73 | 4858.61           | 0.921         | 0.841           | Risk             |

This table lists the CpG sites and corresponding genes identified as prognostic markers. "LASSO Coefficient" indicates the weight assigned to each feature in the risk model. "HR" (Hazard Ratio) and "95% CI" (Confidence Interval) are provided for both univariate and multivariate Cox regression analyses. "Effect Direction" classifies features as risk factors ( $HR \geq 1$ ) or protective factors ( $HR < 1$ ).

**Supplementary Table 11.** Performance evaluation of the methylation-driven prognostic model.

| Performance Metric             | Model Value | Reference Standard | P-value              |
|--------------------------------|-------------|--------------------|----------------------|
| Concordance Index              | 0.782       | 0.650              | $2.3 \times 10^{-8}$ |
| Time Dependent AUC 1yr         | 0.834       | 0.721              | $1.8 \times 10^{-6}$ |
| Time Dependent AUC 3yr         | 0.798       | 0.683              | $4.2 \times 10^{-7}$ |
| Time Dependent AUC 5yr         | 0.745       | 0.642              | $9.1 \times 10^{-5}$ |
| Hosmer Lemeshow Chi2           | 3.142       | NA                 | 0.870                |
| Net Benefit Threshold 0.1      | 0.156       | 0.089              | $1.2 \times 10^{-4}$ |
| Risk Stratification Efficiency | 0.853       | 0.678              | $2.8 \times 10^{-9}$ |
| Cross Validation CV            | 0.776       | 0.643              | NA                   |

Predictive accuracy is assessed using the Concordance Index ("C-Index") and time-dependent Area Under the ROC Curve ("AUC") for 1-, 3-, and 5-year survival. These metrics evaluate the model's ability to discriminate between high-risk and low-risk patients. "Performance Gain" (if applicable) indicates improvement over baseline models.

**Supplementary Table 12.** Baseline clinical characteristics of the independent external validation cohort (GSE39279).

| Characteristic                      | Value                               | Percentage                  |
|-------------------------------------|-------------------------------------|-----------------------------|
| Total Patients                      | 122                                 | 100.0%                      |
| Cancer Type                         | Lung Squamous Cell Carcinoma (LUSC) | 100.0%                      |
| Age (years)                         | 66.0 ± 10.4                         | Median: 68.0 (Range: 35–89) |
| ≤60 years                           | 34                                  | 27.9%                       |
| 60–70 years                         | 36                                  | 29.5%                       |
| ≥70 years                           | 52                                  | 42.6%                       |
| Gender: Male                        | 93                                  | 76.2%                       |
| Gender: Female                      | 29                                  | 23.8%                       |
| Clinical Stage: Stage I             | 56                                  | 45.9%                       |
| Clinical Stage: Stage II            | 41                                  | 33.6%                       |
| Clinical Stage: Stage III           | 25                                  | 20.5%                       |
| Smoking Status: Smoker              | 80                                  | 65.6%                       |
| Smoking Status: Non-smoker          | 4                                   | 3.3%                        |
| Adjuvant Chemotherapy: Received     | 43                                  | 35.2%                       |
| Adjuvant Chemotherapy: Not received | 79                                  | 64.8%                       |

Demographic and clinical features of the patients included in the external validation dataset ( $N = 122$ ). Categorical variables (e.g., Gender, Smoking Status, Stage) are presented as counts and percentages, while continuous variables (e.g., Age) are expressed as Mean ± Standard Deviation (SD) or Median (Range).

**Supplementary Table 13.** Univariate and multivariate Cox proportional hazards regression analysis of the methylation-driven risk score in the validation cohort (GSE39279).

| Variable                   | Univariate HR      | Univariate 95% CI | Univariate P-value | Multivariate HR | Multivariate 95% CI | Multivariate P-value |
|----------------------------|--------------------|-------------------|--------------------|-----------------|---------------------|----------------------|
| Risk Score (continuous)    | 0.9972             | 0.9950–0.9994     | 0.0142             | 0.9966          | 0.9931–1.0001       | 0.0574               |
| Age (per 1-year increase)  | 1.0051             | 0.9774–1.0335     | 0.7227             | 1.0074          | 0.9691–1.0473       | 0.7086               |
| Gender (Male vs Female)    | 1.7703             | 0.8108–3.8653     | 0.1517             | 1.8253          | 0.7071–4.7116       | 0.2136               |
| Clinical Stage (per stage) | 0.9887             | 0.6559–1.4903     | 0.9565             | 1.1712          | 0.7266–1.8876       | 0.5165               |
| Smoking Status (Yes vs No) | $8.05 \times 10^7$ | 0.0000–∞          | 0.9972             | NA              | NA                  | NA                   |

Evaluation of the risk score's prognostic independence in the GSE39279 cohort. "HR" (Hazard Ratio) and "95% CI" are presented for the risk score in both univariate analysis and multivariate analysis adjusted for available clinical covariates. P-values indicate statistical significance ( $p < 0.05$ ).
